# Supplementary material for: CircZFR serves as a prognostic marker to promote bladder cancer progression by regulating miR-377/ZEB2 signaling
Source: PubMed Central journal article supplement (PMC6893170; doi:10.1042/bsr20192779), 2019-12-04
Supplement: BSR-2019-2779_supp.pdf [file BSR-2019-2779_supp.pdf]

**Figure S1**

**A**

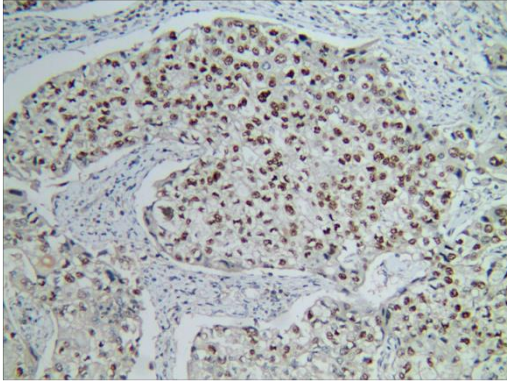

**Bladder cancer**

**B**

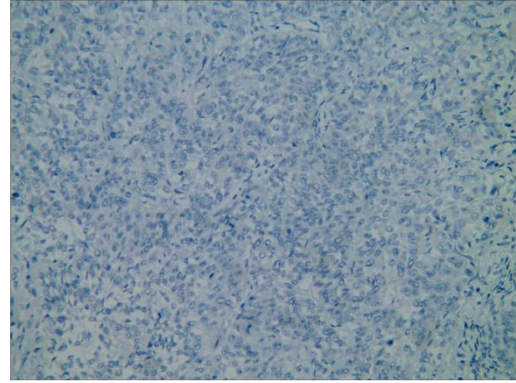

**Normal tissue**

**Figure S1** Immunohistochemistry staining was performed to detect the expression of ZEB2 in the bladder cancer and normal tissues.

The representative analytic results of ZEB2 immunohistochemistry staining of formalin-fixed, paraffin-embedded human bladder cancer tissue(A) and their paired adjacent noncancerous tissues from the same patient (B). (DAB staining, original magnification  $\times 100$ ).
